# Supplementary material for: Transport and clogging dynamics of flexible rods in pore constrictions
Source: Royal Society of Chemistry journal article supplement (doi:10.1039/d4sm00734d), 2024-01-01
Supplement: d4sm00734d1.pdf [file d4sm00734d1.pdf]

## Supplementary information

### Transport and clogging dynamics of flexible rods in pore constrictions

Berinique Bräsel,<sup>a</sup> Matthias Geiger,<sup>a</sup> John Linkhorst,<sup>a</sup> and Matthias Wessling<sup>\*ab</sup>

#### 1 Fluid flow calculation

Fluid flow in the fluid domain  $\Omega_f$  is solved using the Navier-Stokes equation for an incompressible fluid (1) and the continuity equation (2):

$$\rho_f \frac{\partial u_f}{\partial t} + \rho_f (u_f \cdot \nabla) u_f = -\nabla p + \mu \nabla^2 u_f \quad \text{in } \Omega_f \quad (1)$$

$$\nabla \cdot u_f = 0 \quad \text{in } \Omega_f \quad (2)$$

Here,  $\rho_f$ ,  $u_f$ , and  $\mu$  are the density, the velocity, and the viscosity of the fluid, respectively, and  $p$  denotes the pressure. The coupling of the fluid phase with the particulate phase is realized with the following boundary conditions:

$$u_f = u_p \quad \text{in } \Omega_s \quad (3)$$

$$\sigma \cdot \hat{n} = t_{\Gamma_s} \quad \text{on } \Gamma_s \quad (4)$$

Equation (3) is responsible for transferring the particle's velocity  $u_p$  to the fluid velocity field  $u_f$  inside the domain of the particle  $\Omega_s$ . The interface condition in equation (4) describes the fluid stress acting on the particle's interface  $\Gamma_s$ , where  $\sigma$  is the stress tensor of the fluid field,  $\hat{n}$  is the outer normal vector, and  $t_{\Gamma_s}$  denotes the traction vector of the fluid acting on the particle. Integration over the particle's interface  $\Gamma_s$  is performed to transfer equation (4) into a force term  $F_f$  that considers pressure gradient force and viscous forces of the fluid. In our case, other fluid forces, such as Basset, Saffman, and Magnus forces and gravity effects, are small and therefore neglected.

#### 2 Bonded particle model

For the representation of a flexible rod, we use a multi-sphere model with virtual elastic bonds for connection that was developed by Guo et al.<sup>1</sup> and Schramm et al.<sup>2</sup>. The bond forces are calculated incrementally as follows:

$$dF_n^b = K_n^b d\delta_n^b = \frac{E_b A}{l_b} v_n^r dt \quad (5)$$

$$dF_t^b = K_t^b d\delta_t^b = \frac{G_b A}{l_b} v_t^r dt \quad (6)$$

$F_n^b$  and  $F_t^b$  are the normal and tangential forces of the virtual elastic bonds connecting the individual spheres.  $K_n^b$ ,  $K_t^b$ ,  $\delta_n^b$ ,  $\delta_t^b$ ,  $v_n^r$ , and  $v_t^r$  denote the normal and tangential bending stiffness, the normal and tangential (shear) deformation, and the normal and tangential relative velocity between two bonded spheres, respectively. The Young's modulus  $E_b$  and the shear modulus  $G_b$  of the bond are correlated through the Poisson's ratio  $\nu$ :  $E_b = 2(1 + \nu)G_b$ . The bond is assumed to be cylindrical with a radius  $r_b$ , a length  $l_b$ , and a cross-sectional area  $A = \pi r_b^2$ . Here, the bond radius  $r_b$  is assumed to be the same as the radius of an individual sphere  $r_p$ , and the length  $l_b$  is the distance between the centers of two connected spheres, which is twice the radius  $2r_p$ . To account for energy dissipation in the elastic wave propagation through the bonds, a normal and tangential damping force  $F_{damp,n}^b$  and  $F_{damp,t}^b$  are added:

$$F_{damp,n}^b = 2\beta_{damp} \sqrt{m_p K_n^b} v_n^r \quad (7)$$

$$F_{damp,t}^b = 2\beta_{damp} \sqrt{m_p K_t^b} v_t^r \quad (8)$$

where  $\beta_{damp}$  is the bond damping coefficient, and  $m_p$  is the mass of an individual sphere. In the DEM framework, the trajectory of each sub-sphere within the multi-sphere rod is calculated individually based on the sum of the forces acting on it:

$$m_p \ddot{x}_i = F_n + F_t + F_n^b + F_t^b + F_{damp,n}^b + F_{damp,t}^b + F_b + F_f, \quad (9)$$

<sup>a</sup> Chemical Process Engineering AVT.CVT, RWTH Aachen University, Forckenbeckstraße 51, 52074 Aachen, Germany. E-mail: manuscripts.cvt@avt.rwth-aachen.de

<sup>b</sup> DWI - Leibniz Institute for Interactive Materials e.V., Forckenbeckstraße 50, 52074 Aachen, Germany.

where  $F_n$  and  $F_t$  denote the normal and tangential particle-particle and particle-wall contact forces and are calculated with the Hertz contact model<sup>3</sup>.  $F_b$  sums up possible body forces, such as gravity, which is neglected in this work.  $F_f$  is the particle-fluid interaction force. In addition to the Hertz model, we consider rolling friction and tangential sliding. Rolling friction arises from the small-scale non-sphericity of the particles and is taken into account by using a constant directional torque (CDT) model. A history spring model is chosen to account for the resistance from tangential sliding.<sup>4</sup> The calculation of the moments acting on the spheres and bonds is performed analogously to the force calculation.

### 3 Stability criteria

In this work, four numerical stability criteria were used to determine the time steps of CFD and DEM and the coupling interval. For the CFD part, the Courant-Friedrich-Lewy (CFL) condition reads<sup>5</sup>:

$$CFL = \Delta t_{CFD} \max\left(\frac{|u|}{\Delta x}\right) < 1 \quad (10)$$

For the DEM part, the time step is taken as a fraction of 15 % of the Rayleigh time  $\Delta t_R$ , which is defined by:

$$\Delta t_R = \frac{\pi}{2} d_p \sqrt{\frac{\rho_p}{G}} \left( \frac{1}{0.1631\nu + 0.8766} \right) \quad (11)$$

where  $d_p$  and  $\rho_p$  are the diameter and density of the particle,  $G$  denotes the shear modulus and  $\nu$  is the Poisson ratio. The coupling interval  $CI$  resulting from the stability criteria for the CFD and DEM timestep was checked to fulfill<sup>6</sup>:

$$CI \leq \min(\Delta t_{pf}, \Delta t_{fp}) \quad (12)$$

$$\Delta t_{pf} \leq \frac{4}{3} \frac{\varepsilon_f}{(1 - \varepsilon_f)} \frac{d_p}{C_d} \frac{1}{|u - v_i|} \quad (13)$$

$$\Delta t_{fp} \leq \frac{4}{3} \frac{d_p \rho_p}{C_d \rho_f} \frac{1}{|u - v_i|} \quad (14)$$

where  $\varepsilon_f$ ,  $\rho_f$ , and  $u$  are the void fraction, the density, and the velocity vector of the fluid.  $\rho_p$  and  $v_i$  are the density and the velocity vector of the particle.  $C_d$  denotes the fluid drag force and is simplified to Stokes flow with  $C_D = \frac{24}{Re_p}$ .

### 4 Experimental observations: Materials and methods

The microfluidic chips for the validation experiments were fabricated as described elsewhere<sup>7</sup>. Briefly, a casting mold for channels with a width of 200 $\mu$ m and a height of 20 $\mu$ m was printed with a direct laser writing setup, the Nanoscribe Professional GT+ (Nanoscribe GmbH, Germany). The molds were replicated via soft lithography with Polydimethylsiloxane (Sylgard 184, Mavom GmbH, Germany) at a 10:1 ratio of monomer to crosslinker. The microfluidic chips were bonded to cover slips and coated with an MTS:TEOS coating<sup>8</sup>. For the experiments, the channels were filled with the photoresist IP-L 780 Photoresist (Nanoscribe GmbH, Germany) and loaded to the Nanoscribe. The pore constriction was created using in-chip direct laser writing, as described by Lükken et al.<sup>7</sup>. After printing of the pore constriction, tubing was filled with the photoresist IP-L 780 and connected to the chip. Hydrostatic pressure was used to induce a controlled flow of resin through the pore. Particles were fabricated in-situ at the desired location and orientation. Each particle consists of an individual laser trajectory written with a laser power of 50 mW and a scanspeed of 25000 $\mu$ m.

#### Author Contributions

Berinique Bräsel: Conceptualization, Methodology, Formal analysis, Investigation, Data Curation, Writing - Original Draft, Visualization, Project administration.

Matthias Geiger: Investigation, Data Curation, Writing - Original Draft, Visualization.

John Linkhorst: Conceptualization, Writing - Review & Editing, Project administration, Supervision.

Matthias Wessling: Conceptualization, Writing - Review & Editing, Resources, Project administration, Supervision, Funding acquisition.

#### Conflicts of interest

There are no conflicts to declare.

#### Acknowledgements

M.W. acknowledges DFG funding through the Gottfried Wilhelm Leibniz Award 2019 (WE 4678/12-1).

J.L. acknowledges funding through the DFG project MicSurf (grant no 514031987).

#### References

- 1 Y. Guo, C. Wassgren, B. Hancock, W. Ketterhagen and J. Curtis, *Powder Technology*, 2013, **249**, 386–395.

- 2 M. Schramm, M. Z. Tekeste, C. Plouffe and D. Harby, *Biosystems Engineering*, 2019, **186**, 349–355.
- 3 H. Hertz, *Journal für die reine und angewandte Mathematik*, 1881, **171**, 156–171.
- 4 C. Goniva, C. Kloss, N. G. Deen, J. A. Kuipers and S. Pirker, *Particuology*, 2012, **10**, 582–591.
- 5 J. H. Ferziger, M. Perić and R. L. Street, *Computational Methods for Fluid Dynamics, Fourth Edition*, 2019, pp. 1–596.
- 6 B. Blais, M. Lasseigne, C. Goniva, L. Fradette and F. Bertrand, *Journal of Computational Physics*, 2016, **318**, 201–221.
- 7 A. Lüken, M. Geiger, L. Steinbeck, A.-C. Joel, A. Lampert, J. Linkhorst and M. Wessling, *Advanced Healthcare Materials*, 2021, **10**, 2100898.
- 8 L. T. Hirschwald, S. Brosch, G. Linz, J. Linkhorst and M. Wessling, *Advanced Materials Technologies*, 2023, **8**, 2201857.
